# Supplementary material for: Machine learning of atomic force microscopy images of organic solar cells
Source: Royal Society of Chemistry journal article supplement (doi:10.1039/d3ra02492j), 2023-01-01
Supplement: d3ra02492j1.pdf [file d3ra02492j1.pdf]

## *Electronic Supplementary Information*

# Machine learning of atomic force microscopy images of organic solar cells

*Yasuhito Kobayashi,<sup>a,b</sup> Yuta Miyake,<sup>c</sup> Fumitaka Ishiwari,<sup>c,d,e</sup> Shintaro Ishiwata<sup>a</sup> and Akinori Saeki<sup>\*,c,d</sup>*

<sup>a</sup> Division of Materials Physics, Graduate School of Engineering Science, Osaka University, 1-3 Machikaneyama, Toyonaka, Osaka 560-8531, Japan.

<sup>b</sup> Interactive Materials Science CADET, Osaka University, 1-3 Machikaneyama, Toyonaka, Osaka 560-8531, Japan.

<sup>c</sup> Department of Applied Chemistry, Graduate School of Engineering, Osaka University, 2-1 Yamadaoka, Suita, Osaka 565-0871, Japan.

<sup>d</sup> Innovative Catalysis Science Division, Institute for Open and Transdisciplinary Research Initiatives (ICS-OTRI), Osaka University, 1-1 Yamadaoka, Suita, Osaka 565-0871, Japan.

<sup>e</sup> PRESTO, Japan Science and Technology Agency (JST), Kawaguchi, Saitama 332-0012, Japan.

### AUTHOR INFORMATION

#### Corresponding Author

\* saeki@chem.eng.osaka-u.ac.jp (A.S.)

This supporting information presents the following contents.

|                                          |            |
|------------------------------------------|------------|
| <b>Supplementary Code</b> .....          | <b>S2</b>  |
| <b>Supplementary Tables S1–S11</b> ..... | <b>S3</b>  |
| <b>Supplementary Figures S1–S5</b> ..... | <b>S14</b> |

## Supplementary Code

The following is a python code for LASSO analysis. Ridge and RF analyses were also performed in the same manner. “Mord+Prop+Proc\_890.csv” is a data file.

```
=====
from sklearn.linear_model import Lasso, Ridge
from sklearn.model_selection import train_test_split, cross_val_score
from sklearn.ensemble import RandomForestRegressor
import pandas as pd
import numpy as np
import matplotlib.pyplot as plt
import glob, tqdm, math, optuna, json, pickle
from machine_learning import calc_metrics, data_split, reconstruct_linearmodel, plot_yy, set_plot_params,
plot_coef

df_original = pd.read_csv('./dataset/Mord+Prop+Proc_890.csv').set_index('Unnamed: 0')

name = 'LASSO_Original'
dataframe = df_original

dataset = data_split(dataframe,'PCE_max(%)',0.3,random_state=0)

model = Lasso()
def objective(trial):
    params = {'alpha': trial.suggest_loguniform('alpha',0.00001,100)}
    model.set_params(**params)
    scores = cross_val_score(
        model,
        dataset['x_train'],
        dataset['y_train'],
        cv=5,
        scoring='r2',
        n_jobs=-1)
    val = scores.mean()
    return val

study = optuna.create_study(
    study_name = name,
    direction = 'maximize',
    sampler = optuna.samplers.TPESampler(seed=0),
    storage = f'sqlite:///optuna_{name}.db',
    load_if_exists = True
)

study.optimize(objective,n_trials=100,n_jobs=-1)
with open(f'./Bayese_{name}.pickle','wb') as f:
    pickle.dump(study,f,protocol=2)

### re-learning with tuned params
re_model = Lasso(**study.best_params)
metrics, df_coef = reconstruct_linearmodel(Lasso(**study.best_params),dataset,name)
=====
```

## Supplementary Tables

**Table S1.** List of material properties and process parameters of OPVs.

| Material        | Material properties  |                                               | Process parameters |                                        |
|-----------------|----------------------|-----------------------------------------------|--------------------|----------------------------------------|
|                 | Parameter            | Description                                   | Parameter          | Description                            |
| NFA             | -HOMO (eV)           | Absolute HOMO                                 | n/(p+n)            | Blend ratio of polymer (p) and NFA (n) |
| Polymer         | -LUMO (eV)           | Absolute LUMO                                 | Solvent_CF         | chloroform                             |
|                 | $E_g$ (eV)           | Bandgap                                       | Solvent_OX         | <i>o</i> -xylene                       |
|                 | $M$ (g/mol)          | Molecular weight                              | Solvent_TMB        | 1,2,4-trimethylbenzene                 |
|                 | -HOMO (eV)           | Absolute HOMO                                 | Solvent_CB         | chlorobenzene                          |
|                 | -LUMO (eV)           | Absolute LUMO                                 | Solvent_THF        | tetrahydrofuran                        |
|                 | $E_g$ (eV)           | Bandgap                                       | Solvent_AS         | anisole                                |
|                 | $M_w$ (kg/mol)       | Weight-averaged molecular weight              | Solvent_TL         | toluene                                |
| Polymer:<br>NFA | $M_n$ (kg/mol)       | Number-averaged molecular weight              | Solvent_DCB        | <i>o</i> -dichlorobenzene              |
|                 | PDI                  | Polydispersity index                          | Additive_NA        | No additive                            |
|                 | $\Delta$ HOMO (eV)   | Difference of HOMOs of NFA and polymer        | Additive_CN        | 1-chloronaphthalene                    |
|                 | $\Delta$ LUMO (eV)   | Difference of LUMOs of NFA and polymer        | Additive_DIO       | 1,8-diiodooctane                       |
|                 | Effective $E_g$ (eV) | Difference of HOMO of polymer and LUMO of NFA | Additive_Bipy      | Bipyridine                             |
|                 | $E_{g,min}$ (eV)     | Minimum $E_g$ value of polymer and NFA        | Additive_PN        | 1-phenyl-naphthalene                   |
|                 |                      |                                               | Additive_CBA       | <i>o</i> -chlorobenzaldehyde           |
|                 |                      |                                               | Additive_pyr       | pyridine                               |
|                 |                      |                                               | Additive_NMP       | <i>N</i> -methylpyrrolidone            |
|                 |                      |                                               | Additive_BPO       | 4,4'-biphenol                          |
|                 |                      | Additive_DPE                                  | diphenylether      |                                        |
|                 |                      | Additive_ODT                                  | 1,8-octanedithiol  |                                        |
|                 |                      | Additive_DBE                                  | dibenzyl ether     |                                        |

**Table S2.** List of 2D Mordred descriptors.

| No.<br>From | #<br>to | Module | Description                |                                                           |
|-------------|---------|--------|----------------------------|-----------------------------------------------------------|
| 1           | 2       | 2      | ABCIndex                   | Connectivity index                                        |
| 3           | 14      | 12     | AcidBase                   | Acidic/basic group count                                  |
| 15          | 16      | 2      | AdjacencyMatrix            | SpAbs of adjacency matrix                                 |
| 17          | 18      | 2      | Aromatic                   | Aromatic atoms, bond count                                |
| 19          | 35      | 17     | AtomCount                  | Atom count (C, H, ...)                                    |
| 36          | 134     | 99     | Autocorrelation            | Autocorrelation of Topological Structure descriptor (ATS) |
| 135         | 234     | 100    | Autocorrelation            | Averaged ATS descriptor (AATS)                            |
| 235         | 341     | 107    | Autocorrelation            | Centered ATS descriptor (ATSC)                            |
| 342         | 449     | 108    | Autocorrelation            | Averaged ATSC descriptor (AATSC)                          |
| 450         | 545     | 96     | Autocorrelation            | Moran coefficient descriptor (MATS)                       |
| 546         | 641     | 96     | Autocorrelation            | Geary coefficient descriptor (GATS)                       |
| 642         | 665     | 24     | BCUT                       | Burden matrix (BCUT)                                      |
| 666         | 666     | 1      | BalabanJ                   | Balaban's J index descriptor                              |
| 667         | 770     | 104    | BaryszMatrix               | Barysz matrix descriptor (Sp)                             |
| 771         | 771     | 1      | BertzCT                    | Bertz CT descriptor                                       |
| 772         | 780     | 9      | BondCount                  | Number of double bonds, etc                               |
| 781         | 782     | 2      | CPSA                       | relative negative/positive charge                         |
| 783         | 793     | 11     | CarbonTypes                | SP carbon bound to 1 other carbon, etc                    |
| 794         | 849     | 56     | Chi                        | 3-ordered Chi chain weighted by sigma electrons, etc      |
| 850         | 865     | 16     | Constitutional             | Sum of constitutional descriptor                          |
| 866         | 879     | 14     | DetourMatrix               | detour matrix descriptor.                                 |
| 880         | 891     | 12     | DistanceMatrix             | distance matrix descriptor                                |
| 892         | 1207    | 316    | EState                     | atom type e-state descriptor.                             |
| 1208        | 1208    | 1      | EccentricConnectivityIndex | eccentric connectivity index                              |
| 1209        | 1253    | 45     | ExtendedTopochemicalAtom   | Extended Topochemical Atom(ETA) descriptor                |
| 1254        | 1254    | 1      | FragmentComplexity         | fragment complexity descriptor.                           |
| 1255        | 1255    | 1      | Framework                  | molecular framework ratio                                 |
| 1256        | 1257    | 2      | HydrogenBond               | number of hydrogen bond acceptor/donor                    |
| 1258        | 1299    | 42     | InformationContent         | neighborhood information content descriptor.              |
| 1300        | 1302    | 3      | KappaShapeIndex            | Kappa shape index 1 descriptor.                           |
| 1303        | 1304    | 2      | Lipinski                   | Lipinski rule of 5 descriptor                             |
| 1305        | 1305    | 1      | LogS                       | Filter-it <sup>TM</sup> LogS descriptor                   |
| 1306        | 1306    | 1      | McGowanVolume              | McGowan volume                                            |
| 1307        | 1359    | 53     | MoeType                    | Labute's Approximate Surface Area descriptor              |
| 1360        | 1378    | 19     | MolecularDistanceEdge      | molecular distance edge descriptor                        |
| 1379        | 1390    | 12     | MolecularId                | molecular id descriptor                                   |
| 1391        | 1411    | 21     | PathCount                  | path count descriptor                                     |
| 1412        | 1413    | 2      | Polarizability             | atomic polarizability descriptor.                         |
| 1414        | 1551    | 138    | RingCount                  | ring count descriptor                                     |
| 1552        | 1553    | 2      | RotatableBond              | rotatable bonds count descriptor                          |
| 1554        | 1555    | 2      | SLogP                      | Wildman-Crippen LogP/MR descriptor                        |
| 1556        | 1557    | 2      | TopoPSA                    | topological polar surface area descriptor                 |
| 1558        | 1578    | 21     | TopologicalCharge          | topological charge descriptor                             |
| 1579        | 1582    | 4      | TopologicalIndex           | topological diameter, radius, etc                         |
| 1583        | 1583    | 1      | VdwVolumeABC               | ABC van der waals volume                                  |
| 1584        | 1584    | 1      | VertexAdjacencyInformation | vertex adjacency information descriptor                   |
| 1585        | 1605    | 21     | WalkCount                  | walk count descriptor                                     |
| 1606        | 1607    | 2      | Weight                     | exact molecular weight                                    |
| 1608        | 1609    | 2      | WienerIndex                | Wiener index                                              |
| 1610        | 1613    | 4      | ZagrebIndex                | Zagreb index descriptor                                   |

<https://mordred-descriptor.github.io/documentation/master/descriptors.html>

**Table S3.** List of LASSO coefficients (Mordred descriptors and material and process parameters as the inputs) sorted in descend order.

| Negative coefficient |                   |                       | Positive coefficient |              |                       |
|----------------------|-------------------|-----------------------|----------------------|--------------|-----------------------|
| Descriptor           | Coefficient       | Category <sup>a</sup> | Descriptor           | Coefficient  | Category <sup>a</sup> |
| 1                    | n_GATS6s          | -4.01 N               | p_AATSC0i            | 3.11 P       |                       |
| 2                    | n_MATS4s          | -2.92 N               | n_AATSC2d            | 2.32 N       |                       |
| 3                    | n_GATS3se         | -2.09 N               | n_SaaaC              | 2.02 N       |                       |
| 4                    | p_AATSC8dv        | -1.98 N               | p_MATS2se            | 1.87 P       |                       |
| 5                    | PDI               | -1.78 P               | -LUMO_n(eV)          | 1.74 N       |                       |
| 6                    | n_SdssC           | -1.72 N               | p_AATS1v             | 1.63 P       |                       |
| 7                    | n_GATS5v          | -1.68 N               | Solvent_TMB          | 1.47 Process |                       |
| 8                    | p_MATS8s          | -1.62 P               | p_n9FRing            | 1.30 P       |                       |
| 9                    | n_MATS8pe         | -1.47 N               | n_nCl                | 1.27 N       |                       |
| 10                   | p_GATS2dv         | -1.44 P               | Eg_p(eV)             | 1.17 P       |                       |
| 11                   | $\Delta$ HOMO(eV) | -1.33 P/N             | p_GATS6p             | 1.13 P       |                       |
| 12                   | n_VSA_EState6     | -1.20 N               | n_AATSC4Z            | 0.99 N       |                       |
| 13                   | p_AATSC8s         | -1.08 P               | n_TopoPSA            | 0.91 N       |                       |
| 14                   | n_AATSC8m         | -0.87 N               | n_GATS7Z             | 0.72 N       |                       |
| 15                   | n_MATS8s          | -0.80 N               | p_SssS               | 0.60 P       |                       |
| 16                   | n_AATS8s          | -0.76 N               | n_nFARing            | 0.47 N       |                       |
| 17                   | n_BCUTd-11        | -0.75 N               | p_EState_VSA8        | 0.38 P       |                       |
| 18                   | Additive_Nan      | -0.69 Process         | n_BCUTpe-1h          | 0.36 N       |                       |
| 19                   | p_MDEC-33         | -0.67 Process         | Additive_DIO         | 0.26 Process |                       |
| 20                   | Solvent_CB        | -0.61 Process         | p_C1SP2              | 0.19 P       |                       |
| 21                   | n_GATS3i          | -0.60 N               | n_NsCl               | 0.17 N       |                       |
| 22                   | n_GATS5i          | -0.53 N               | p_MATS5se            | 0.11 P       |                       |
| 23                   | Solvent_TL        | -0.50 Process         | n_MDEC-23            | 0.10 N       |                       |
| 24                   | Eg_n(eV)          | -0.50 N               | n_MATS3p             | 0.06 N       |                       |
| 25                   | p_n8FARing        | -0.47 P               | Solvent_CF           | 0.02 Process |                       |
| 26                   | p_AATSC8Z         | -0.43 P               | p_n9FHRing           | 0.00 P       |                       |
| 27                   | n_GATS3Z          | -0.39 N               |                      |              |                       |
| 28                   | n_BCUTs-11        | -0.35 N               |                      |              |                       |
| 29                   | p_nAHRing         | -0.32 P               |                      |              |                       |
| 30                   | n_n9FHRing        | -0.28 N               |                      |              |                       |

<sup>a</sup>Parameter category: P = polymer, N = NFA, P/N= difference of P and N.

**Table S4.** Multi-colinearity of AATSC0i (polymer, p). The descriptors and their correlation coefficients ( $r$ ) in top 30<sup>th</sup> are sorted in decent order for the positive and negative category.

| Rank | Mordred descriptor | Positive $r$ | Mordred descriptor | Negative $r$ |
|------|--------------------|--------------|--------------------|--------------|
| 1    | <b>p_AMID_X</b>    | <b>0.881</b> | p_MINaasC          | -0.849       |
| 2    | p_AATSC0are        | 0.871        | p_GATS1dv          | -0.730       |
| 3    | p_AATSC0pe         | 0.868        | p_ETA_dEpsilon_C   | -0.723       |
| 4    | p_AATSC0s          | 0.867        | p_GATS1pe          | -0.705       |
| 5    | <b>p_nF</b>        | <b>0.863</b> | p_SM1_Dzp          | -0.699       |
| 6    | p_NsF              | 0.863        | p_BCUTp-1l         | -0.692       |
| 7    | p_AATS0s           | 0.856        | p_ETA_psi_1        | -0.679       |
| 8    | p_SlogP_VSA10      | 0.853        | p_GATS1are         | -0.676       |
| 9    | p_SsF              | 0.843        | p_MINaaCH          | -0.673       |
| 10   | p_BCUTi-1h         | 0.837        | p_GATS2dv          | -0.663       |
| 11   | p_AATSC0se         | 0.835        | p_BCUTv-1l         | -0.652       |
| 12   | p_nX               | 0.812        | p_MINsCH3          | -0.646       |
| 13   | p_MID_X            | 0.812        | p_GATS4s           | -0.621       |
| 14   | p_BCUTpe-1h        | 0.806        | p_GATS2pe          | -0.616       |
| 15   | p_AATS0are         | 0.803        | p_SM1_Dzv          | -0.613       |
| 16   | p_BCUTare-1h       | 0.801        | p_MINaaS           | -0.612       |
| 17   | p_PEOE_VSA3        | 0.796        | p_AMID_C           | -0.602       |
| 18   | p_AATSC3se         | 0.780        | p_AXp-0dv          | -0.587       |
| 19   | p_VSA_EState1      | 0.775        | p_GATS2are         | -0.587       |
| 20   | p_AATS0pe          | 0.775        | p_GATS3pe          | -0.584       |
| 21   | p_AATSC3pe         | 0.773        | p_GATS1s           | -0.572       |
| 22   | p_Mare             | 0.770        | p_MAXaasC          | -0.552       |
| 23   | p_AATS3s           | 0.761        | p_GATS4dv          | -0.550       |
| 24   | p_BCUTse-1h        | 0.759        | p_GATS2s           | -0.544       |
| 25   | p_AETA_beta_ns_d   | 0.759        | p_MAXaaS           | -0.543       |
| 26   | p_BCUTdv-1h        | 0.758        | p_GATS3se          | -0.542       |
| 27   | p_AATSC2s          | 0.751        | p_MINssCH2         | -0.534       |
| 28   | p_AATS5s           | 0.749        | p_GATS1se          | -0.518       |
| 29   | p_AATSC0dv         | 0.747        | p_MATS6i           | -0.514       |
| 30   | p_AATS0se          | 0.743        | p_VSA_EState5      | -0.513       |

**Table S5.** Multi-collinearity of GATS6s (NFA, n). The descriptors and their correlation coefficients ( $r$ ) in top 30<sup>th</sup> are sorted in decent order for the positive and negative category.

| Rank | Mordred descriptor | Positive $r$ | Mordred descriptor | Negative $r$  |
|------|--------------------|--------------|--------------------|---------------|
| 1    | n_GATS6are         | 0.960        | n_MATS6s           | -0.872        |
| 2    | n_GATS6se          | 0.953        | n_ATSC6s           | -0.840        |
| 3    | n_GATS6pe          | 0.953        | n_AATSC6s          | -0.836        |
| 4    | n_GATS5s           | 0.895        | n_MATS6se          | -0.822        |
| 5    | n_GATS7s           | 0.877        | n_MATS6are         | -0.819        |
| 6    | n_GATS8s           | 0.870        | n_AATSC6se         | -0.818        |
| 7    | n_GATS5are         | 0.854        | n_ATSC6se          | -0.813        |
| 8    | n_GATS6dv          | 0.844        | n_MATS6pe          | -0.803        |
| 9    | n_GATS5pe          | 0.838        | n_AATSC6are        | -0.802        |
| 10   | n_GATS5se          | 0.831        | n_ATSC6are         | -0.785        |
| 11   | n_GATS7pe          | 0.828        | n_AATSC6pe         | -0.783        |
| 12   | n_GATS4s           | 0.826        | <b>n_NtN</b>       | <b>-0.753</b> |
| 13   | n_GATS7are         | 0.823        | <b>n_C1SP1</b>     | <b>-0.753</b> |
| 14   | n_GATS8are         | 0.818        | n_SMR_VSA2         | -0.753        |
| 15   | n_GATS4are         | 0.817        | n_StN              | -0.751        |
| 16   | n_GATS4se          | 0.815        | n_EState_VSA10     | -0.744        |
| 17   | n_GATS8pe          | 0.814        | n_ATSC6pe          | -0.733        |
| 18   | n_GATS5dv          | 0.812        | n_nBondsT          | -0.728        |
| 19   | n_GATS8se          | 0.803        | n_PEOE_VSA10       | -0.722        |
| 20   | n_GATS4pe          | 0.803        | n_ATSC7se          | -0.720        |
| 21   | n_GATS7se          | 0.798        | n_PEOE_VSA4        | -0.712        |
| 22   | n_BCUTd-11         | 0.752        | n_AATSC5s          | -0.698        |
| 23   | n_C1SP2            | 0.716        | n_MATS5s           | -0.692        |
| 24   | n_AMID_O           | 0.714        | n_n9FRing          | -0.691        |
| 25   | n_MATS2are         | 0.708        | n_ATSC7s           | -0.681        |
| 26   | n_PEOE_VSA13       | 0.700        | n_ATSC5s           | -0.679        |
| 27   | n_GATS7dv          | 0.697        | n_AATSC7se         | -0.669        |
| 28   | n_MATS2pe          | 0.669        | n_NtsC             | -0.668        |
| 29   | n_GATS8dv          | 0.665        | n_ATSC8se          | -0.665        |
| 30   | n_GATS3i           | 0.659        | n_MATS3s           | -0.665        |

**Table S6.** List of LASSO coefficients (Mordred descriptors, material and process parameters, GLCM, and HA as the inputs) sorted in descend order. GLSM and HA parameters are highlighted by bold.

| Negative coefficient |                        |                       | Positive coefficient |              |                       |
|----------------------|------------------------|-----------------------|----------------------|--------------|-----------------------|
| Descriptor           | Coefficient            | Category <sup>a</sup> | Descriptor           | Coefficient  | Category <sup>a</sup> |
| 1                    | n_GATS6s               | -4.54 N               | p_AATSC0i            | 2.83 P       |                       |
| 2                    | <b>Homogeneity_2_0</b> | <b>-3.15 GLCM</b>     | n_AATSC2d            | 2.60 N       |                       |
| 3                    | n_MATS4s               | -3.06 N               | n_SaaaC              | 1.97 N       |                       |
| 4                    | n_GATS3se              | -2.53 N               | p_MATS2se            | 1.45 P       |                       |
| 5                    | p_AATSC8dv             | -2.37 P               | Solvent_TMB          | 1.40 Process |                       |
| 6                    | <b>Maximum Height</b>  | <b>-2.13 HA</b>       | p_n9FRing            | 1.26 P       |                       |
| 7                    | n_GATS5v               | -1.75 N               | p_AATS2v             | 1.15 P       |                       |
| 8                    | PDI                    | -1.75 P               | Eg_p(eV)             | 1.12 P       |                       |
| 9                    | p_MATS8s               | -1.69 P               | n_nCl                | 1.04 N       |                       |
| 10                   | n_SdssC                | -1.65 N               | -LUMO_n(eV)          | 0.89 N       |                       |
| 11                   | n_VSA_EState6          | -1.36 N               | n_MDEC-23            | 0.77 N       |                       |
| 12                   | Eg_n(eV)               | -1.29 N               | n_GATS7Z             | 0.72 N       |                       |
| 13                   | <b>Correlation_4_0</b> | <b>-1.20 GLCM</b>     | p_C1SP2              | 0.60 P       |                       |
| 14                   | n_MATS8s               | -0.97 N               | p_GATS6p             | 0.57 P       |                       |
| 15                   | n_MATS8pe              | -0.95 N               | p_SssS               | 0.51 P       |                       |
| 16                   | p_GATS2dv              | -0.94 P               | p_EState_VSA8        | 0.44 P       |                       |
| 17                   | $\Delta$ HOMO(eV)      | -0.92 P/N             | n_AATSC4Z            | 0.37 N       |                       |
| 18                   | n_BCUTd-11             | -0.86 N               | p_AATS1v             | 0.37 P       |                       |
| 19                   | n_AATSC8m              | -0.81 N               | p_SlogP_VSA10        | 0.33 P       |                       |
| 20                   | p_GATS3dv              | -0.78 P               | n_nFARing            | 0.33 N       |                       |
| 21                   | Additive_Nan           | -0.66 Process         | n_AATSC4m            | 0.31 N       |                       |
| 22                   | p_AATSC8Z              | -0.56 P               | Additive_DIO         | 0.23 Process |                       |
| 23                   | p_MDEC-33              | -0.54 P               | n_TopoPSA            | 0.13 N       |                       |
| 24                   | Solvent_CB             | -0.47 Process         | n_BCUTse-1h          | 0.11 N       |                       |
| 25                   | n_AATS8s               | -0.46 N               | n_NsCl               | 0.07 N       |                       |
| 26                   | p_GATS1i               | -0.44 P               | Solvent_DCB          | 0.05 Process |                       |
| 27                   | p_n8FARing             | -0.37 P               | p_NaaN               | 0.04 P       |                       |
| 28                   | n_nBridgehead          | -0.35 N               | Additive_CN          | 0.01 Process |                       |
| 29                   | p_n10FHRing            | -0.33 P               | p_n9FHRing           | 0.00 P       |                       |
| 30                   | n_BCUTs-11             | -0.31 N               |                      |              |                       |

<sup>a</sup> Parameter category: P = polymer, N = NFA, P/N= difference of P and N.



**Table S7.** List of LASSO coefficients (Mordred descriptors, material and process parameters, FFT, and HA as the inputs) sorted in descend order. FFT and HA parameters are highlighted by bold.

| Negative coefficient |                       |               | Positive coefficient  |               |              |                       |
|----------------------|-----------------------|---------------|-----------------------|---------------|--------------|-----------------------|
|                      | Descriptor            | Coefficient   | Category <sup>a</sup> | Descriptor    | Coefficient  | Category <sup>a</sup> |
| 1                    | n_GATS6s              | -4.259        | N                     | p_AATSC0i     | 2.780        | P                     |
| 2                    | <b>Maximum Height</b> | <b>-3.218</b> | <b>HA</b>             | <b>65.22</b>  | <b>2.727</b> | <b>FFT</b>            |
| 3                    | n_MATS4s              | -3.089        | N                     | n_AATSC2d     | 2.511        | N                     |
| 4                    | n_GATS3se             | -2.567        | N                     | n_SaaaC       | 1.916        | N                     |
| 5                    | PDI                   | -2.295        | P                     | <b>40.54</b>  | <b>1.880</b> | <b>FFT</b>            |
| 6                    | p_AATSC8dv            | -2.191        | <b>P</b>              | p_MATS2se     | 1.717        | P                     |
| 7                    | p_MATS8s              | -1.990        | P                     | Solvent_TMB   | 1.413        | Process               |
| 8                    | n_SdssC               | -1.984        | N                     | p_n9FRing     | 1.254        | P                     |
| 9                    | n_GATS5v              | -1.879        | N                     | p_AATS1v      | 1.233        | P                     |
| 10                   | n_VSA_EState6         | -1.566        | N                     | -LUMO_n(eV)   | 1.208        | N                     |
| 11                   | n_MATS8pe             | -1.553        | N                     | Eg_p(eV)      | 1.196        | P                     |
| 12                   | $\Delta$ HOMO(eV)     | -1.179        | P/N                   | n_nCl         | 1.163        | N                     |
| 13                   | p_GATS2dv             | -1.058        | P                     | n_MDEC-23     | 0.943        | N                     |
| 14                   | Eg_n(eV)              | -1.031        | N                     | n_GATS7Z      | 0.832        | N                     |
| 15                   | n_MATS8s              | -0.935        | N                     | p_GATS6p      | 0.796        | P                     |
| 16                   | n_BCUTd-11            | -0.916        | N                     | n_TopoPSA     | 0.661        | N                     |
| 17                   | p_MDEC-33             | -0.798        | P                     | p_EState_VSA8 | 0.626        | P                     |
| 18                   | p_GATS3dv             | -0.770        | P                     | n_AATSC4m     | 0.595        | N                     |
| 19                   | n_AATSC8m             | -0.701        | N                     | p_C1SP2       | 0.559        | P                     |
| 20                   | Additive_Nan          | -0.619        | Process               | p_SssS        | 0.517        | P                     |
| 21                   | Solvent_CB            | -0.490        | Process               | p_SlogP_VSA10 | 0.477        | P                     |
| 22                   | p_AATSC8Z             | -0.487        | P                     | n_nFARing     | 0.455        | N                     |
| 23                   | n_AATS8s              | -0.446        | N                     | <b>34.88</b>  | <b>0.451</b> | <b>FFT</b>            |
| 24                   | n_BCUTs-11            | -0.446        | N                     | <b>51.72</b>  | <b>0.319</b> | <b>FFT</b>            |
| 25                   | p_NdssC               | -0.433        | P                     | p_AATS2v      | 0.299        | P                     |
| 26                   | p_MATS6p              | -0.417        | P                     | Additive_DIO  | 0.277        | Process               |
| 27                   | n_GATS3Z              | -0.407        | N                     | Solvent_DCB   | 0.114        | Process               |
| 28                   | p_AATSC8s             | -0.380        | P                     | n_BCUTse-1h   | 0.088        | N                     |
| 29                   | n/(p+n)               | -0.374        | Process               | n_NsCl        | 0.075        | N                     |
| 30                   | p_n10FHRing           | -0.361        | P                     | p_n9FHRing    | 0.000        | P                     |

<sup>a</sup> Parameter category: P = polymer, N = NFA, P/N= difference of P and N. Descriptors with FFT category represents the spatial wavelength.

**Table S8.** List of Ridge regression coefficients (Mordred descriptors, material and process parameters, FFT, and HA as the inputs) sorted in descend order. FFT and HA parameters are highlighted by bold.

| Negative coefficient |                       |               | Positive coefficient  |                   |              |                       |
|----------------------|-----------------------|---------------|-----------------------|-------------------|--------------|-----------------------|
|                      | Descriptor            | Coefficient   | Category <sup>a</sup> | Descriptor        | Coefficient  | Category <sup>a</sup> |
| 1                    | <b>Maximum Height</b> | <b>-0.746</b> | <b>HA</b>             | Solvent_TMB       | 0.840        | Process               |
| 2                    | n_MATS4s              | -0.724        | N                     | n_MDEC-23         | 0.658        | N                     |
| 3                    | p_MDEC-33             | -0.646        | P                     | -LUMO_n(eV)       | 0.593        | N                     |
| 4                    | n_AATSC4s             | -0.606        | N                     | Eg_p(eV)          | 0.531        | P                     |
| 5                    | Eg_n(eV)              | -0.583        | N                     | $\Delta$ LUMO(eV) | 0.529        | P/N                   |
| 6                    | $\Delta$ HOMO(eV)     | -0.566        | P/N                   | p_C1SP2           | 0.479        | P                     |
| 7                    | <b>Mean</b>           | <b>-0.565</b> | <b>HA</b>             | n_NsCl            | 0.431        | N                     |
| 8                    | <b>Skewness</b>       | <b>-0.551</b> | <b>HA</b>             | n_nCl             | 0.431        | N                     |
| 9                    | Additive_Nan          | -0.548        | Process               | n_EState_VSA9     | 0.418        | N                     |
| 10                   | n/(p+n)               | -0.534        | P/N                   | p_MATS2se         | 0.411        | P                     |
| 11                   | n_GATS6s              | -0.523        | N                     | Additive_DIO      | 0.406        | Process               |
| 12                   | PDI                   | -0.523        | P                     | n_SsCl            | 0.404        | N                     |
| 13                   | p_AATSC8dv            | -0.520        | P                     | p_SssS            | 0.399        | P                     |
| 14                   | n_MATS8s              | -0.517        | N                     | -HOMO_p(eV)       | 0.393        | P                     |
| 15                   | Solvent_CB            | -0.504        | Process               | n_PEOE_VSA4       | 0.372        | N                     |
| 16                   | n_SdssC               | -0.477        | N                     | n_MATS3p          | 0.370        | N                     |
| 17                   | p_MATS8s              | -0.461        | P                     | n_GATS7Z          | 0.367        | N                     |
| 18                   | n_ETA_dPsi_B          | -0.443        | N                     | p_GATS6p          | 0.355        | P                     |
| 19                   | n_BCUTd-1l            | -0.441        | N                     | Additive_CBA      | 0.354        | Process               |
| 20                   | <b>Variance</b>       | <b>-0.435</b> | <b>HA</b>             | p_AATSC0i         | 0.352        | P                     |
| 21                   | p_EState_VSA7         | -0.433        | P                     | n_GATS7m          | 0.352        | N                     |
| 22                   | p_AATSC8s             | -0.413        | P                     | p_n9FAHRing       | 0.351        | P                     |
| 23                   | n_SsBr                | -0.400        | N                     | p_n9FARing        | 0.351        | P                     |
| 24                   | n_NsBr                | -0.399        | N                     | n_MATS6s          | 0.349        | N                     |
| 25                   | n_nBr                 | -0.399        | N                     | n_BCUTdv-1h       | 0.343        | N                     |
| 26                   | n_JGI4                | -0.393        | N                     | n_NdsssP          | 0.334        | N                     |
| 27                   | p_n10FHRing           | -0.386        | P                     | n_nP              | 0.334        | N                     |
| 28                   | p_n10FaHRing          | -0.386        | P                     | p_SlogP_VSA10     | 0.328        | P                     |
| 29                   | n_EState_VSA6         | -0.380        | N                     | Solvent_THF       | 0.325        | Process               |
| 30                   | p_MATS8dv             | -0.376        | P                     | <b>65.22</b>      | <b>0.319</b> | <b>FFT</b>            |

<sup>a</sup> Parameter category: P = polymer, N = NFA, P/N= difference of P and N. Descriptors with FFT category represents the spatial wavelength.

**Table S9.** List of random forest feature importance (Mordred descriptors, material and process parameters as the inputs) sorted in descend order.

|    | Descriptor        | Coefficient | Category <sup>a</sup> |
|----|-------------------|-------------|-----------------------|
| 1  | n_StN             | 0.11425     | N                     |
| 2  | n_VSA_EState3     | 0.05838     | N                     |
| 3  | n_GATS5pe         | 0.02768     | N                     |
| 4  | n_AATSC3m         | 0.01495     | N                     |
| 5  | p_AATSC8se        | 0.01317     | P                     |
| 6  | p_ETA_shape_y     | 0.01315     | P                     |
| 7  | $\Delta$ HOMO(eV) | 0.01288     | P/N                   |
| 8  | n_GATS4se         | 0.01161     | N                     |
| 9  | Eg_n(eV)          | 0.01126     | N                     |
| 10 | -HOMO_p(eV)       | 0.01070     | P                     |
| 11 | p_ATSC8s          | 0.01053     | P                     |
| 12 | n_GATS3i          | 0.01015     | N                     |
| 13 | n_AATSC3p         | 0.00932     | N                     |
| 14 | n_BCUTs-1l        | 0.00896     | N                     |
| 15 | p_MATS5dv         | 0.00850     | P                     |
| 16 | n_AATSC3v         | 0.00761     | N                     |
| 17 | $\Delta$ LUMO(eV) | 0.00728     | P/N                   |
| 18 | -HOMO_n(eV)       | 0.00719     | N                     |
| 19 | p_AATSC5dv        | 0.00708     | P                     |
| 20 | -LUMO_n(eV)       | 0.00603     | N                     |
| 21 | p_GATS1i          | 0.00583     | P                     |
| 22 | n_GATS6pe         | 0.00571     | N                     |
| 23 | p_ETA_dEpsilon_B  | 0.00551     | P                     |
| 24 | n_GATS6i          | 0.00515     | N                     |
| 25 | n_GATS5are        | 0.00500     | N                     |
| 26 | n_AATSC3Z         | 0.00482     | N                     |
| 27 | Mn (kg/mol)       | 0.00461     | P                     |
| 28 | p_AATSC8dv        | 0.00460     | P                     |
| 29 | n_MATS5are        | 0.00453     | N                     |
| 30 | p_AATSC4dv        | 0.00452     | P                     |

<sup>a</sup>Parameter category: P = polymer, N = NFA, P/N= difference of P and N.

**Table S10.** List of random forest feature importance (Mordred descriptors, material and process parameters, GLCM, and HA as the inputs) sorted in descend order. GLSM and HA parameters are highlighted by bold.

|    | Descriptor             | Coefficient    | Category <sup>a</sup> |
|----|------------------------|----------------|-----------------------|
| 1  | n_StN                  | 0.14443        | N                     |
| 2  | n_VSA_EState3          | 0.05358        | N                     |
| 3  | n_GATS5pe              | 0.02300        | N                     |
| 4  | n_AATSC3m              | 0.01880        | N                     |
| 5  | p_AATSC8se             | 0.01538        | P                     |
| 6  | p_ETA_shape_y          | 0.01372        | P                     |
| 7  | n_GATS4se              | 0.01284        | N                     |
| 8  | p_ATSC8s               | 0.00959        | P                     |
| 9  | n_BCUTs-11             | 0.00946        | N                     |
| 10 | Eg_n(eV)               | 0.00934        | N                     |
| 11 | $\Delta$ HOMO(eV)      | 0.00928        | P/N                   |
| 12 | -HOMO_p(eV)            | 0.00909        | P                     |
| 13 | n_GATS3i               | 0.00879        | N                     |
| 14 | n_AATSC3v              | 0.00828        | N                     |
| 15 | n_AATSC3p              | 0.00819        | N                     |
| 16 | p_MATS5dv              | 0.00695        | P                     |
| 17 | -HOMO_n(eV)            | 0.00670        | N                     |
| 18 | p_AATSC5dv             | 0.00629        | P                     |
| 19 | $\Delta$ LUMO(eV)      | 0.00614        | P/N                   |
| 20 | n_GATS6pe              | 0.00597        | N                     |
| 21 | n_GATS6i               | 0.00570        | N                     |
| 22 | <b>Correlation_2_0</b> | <b>0.00564</b> | <b>GLCM</b>           |
| 23 | p_ETA_dEpsilon_B       | 0.00556        | P                     |
| 24 | p_GATS1i               | 0.00506        | P                     |
| 25 | p_AATSC8dv             | 0.00487        | P                     |
| 26 | n_GATS5are             | 0.00481        | N                     |
| 27 | -LUMO_n(eV)            | 0.00479        | N                     |
| 28 | p_AETA_beta            | 0.00472        | P                     |
| 29 | n_AATSC3Z              | 0.00470        | N                     |
| 30 | n_GATS4s               | 0.00452        | N                     |

<sup>a</sup>Parameter category: P = polymer, N = NFA, P/N= difference of P and N.

**Table S11.** List of random forest feature importance (Mordred descriptors, material and process parameters, FFT, and HA as the inputs) sorted in descend order. FFT and HA parameters are highlighted by bold.

|    | Descriptor        | Coefficient | Category <sup>a</sup> |
|----|-------------------|-------------|-----------------------|
| 1  | n_StN             | 0.06983     | N                     |
| 2  | n_VSA_EState3     | 0.04794     | N                     |
| 3  | n_GATS5pe         | 0.02383     | N                     |
| 4  | n_ATSC6s          | 0.01130     | N                     |
| 5  | p_ETA_shape_y     | 0.01107     | P                     |
| 6  | n_GATS4s          | 0.01049     | N                     |
| 7  | n_GATS5are        | 0.01011     | N                     |
| 8  | p_AATSC8se        | 0.00960     | P                     |
| 9  | n_AATSC3m         | 0.00857     | N                     |
| 10 | n_ATSC1s          | 0.00854     | N                     |
| 11 | p_AATSC5dv        | 0.00834     | P                     |
| 12 | n_BCUTs-1l        | 0.00820     | N                     |
| 13 | p_ATSC8s          | 0.00813     | P                     |
| 14 | p_MATS5dv         | 0.00773     | P                     |
| 15 | n_GATS4se         | 0.00735     | N                     |
| 16 | n_GATS3i          | 0.00730     | N                     |
| 17 | $\Delta$ HOMO(eV) | 0.00711     | P/N                   |
| 18 | Eg_n(eV)          | 0.00707     | N                     |
| 19 | n_GATS3s          | 0.00694     | N                     |
| 20 | n_AATSC3p         | 0.00653     | N                     |
| 21 | p_AATSC8dv        | 0.00636     | P                     |
| 22 | n_GATS5s          | 0.00610     | N                     |
| 23 | n_AATSC3Z         | 0.00601     | N                     |
| 24 | p_ETA_dEpsilon_B  | 0.00598     | P                     |
| 25 | n_AATSC3v         | 0.00528     | N                     |
| 26 | -HOMO_p(eV)       | 0.00520     | P                     |
| 27 | n_AATSC6s         | 0.00512     | N                     |
| 28 | n_MATS5are        | 0.00502     | N                     |
| 29 | n_AATSC1s         | 0.00478     | N                     |
| 30 | n_BCUTd-1l        | 0.00475     | N                     |

<sup>a</sup>Parameter category: P = polymer, N = NFA, P/N= difference of P and N. Descriptors with FFT category represents the spatial wavelength.

## Supplementary Figures

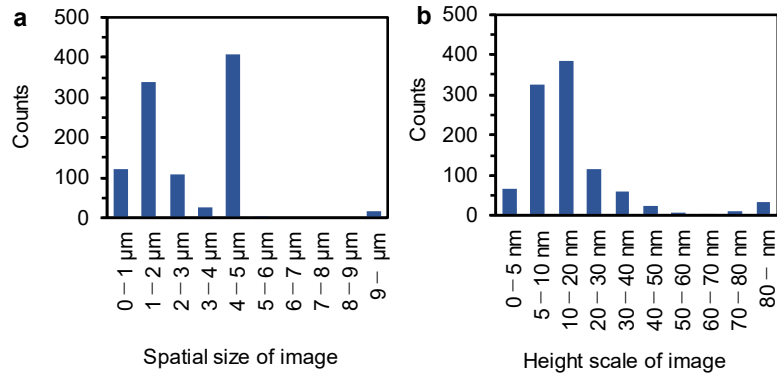

**Figure S1.** Histogram of AFM topological images collected from literatures (the total number is 1062). (a) The spatial size of image and (b) height scale of image.

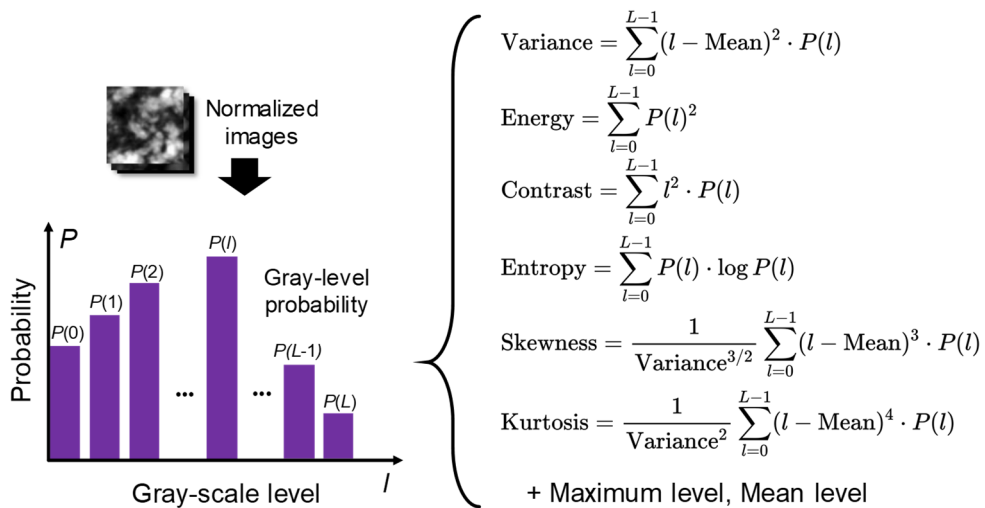

**Figure S2.** Schematic of histogram analysis (HA). Equations for HA (variance, energy, contrast, entropy, skewness, and kurtosis) are shown. The maximum and mean levels are also considered in ML modeling.

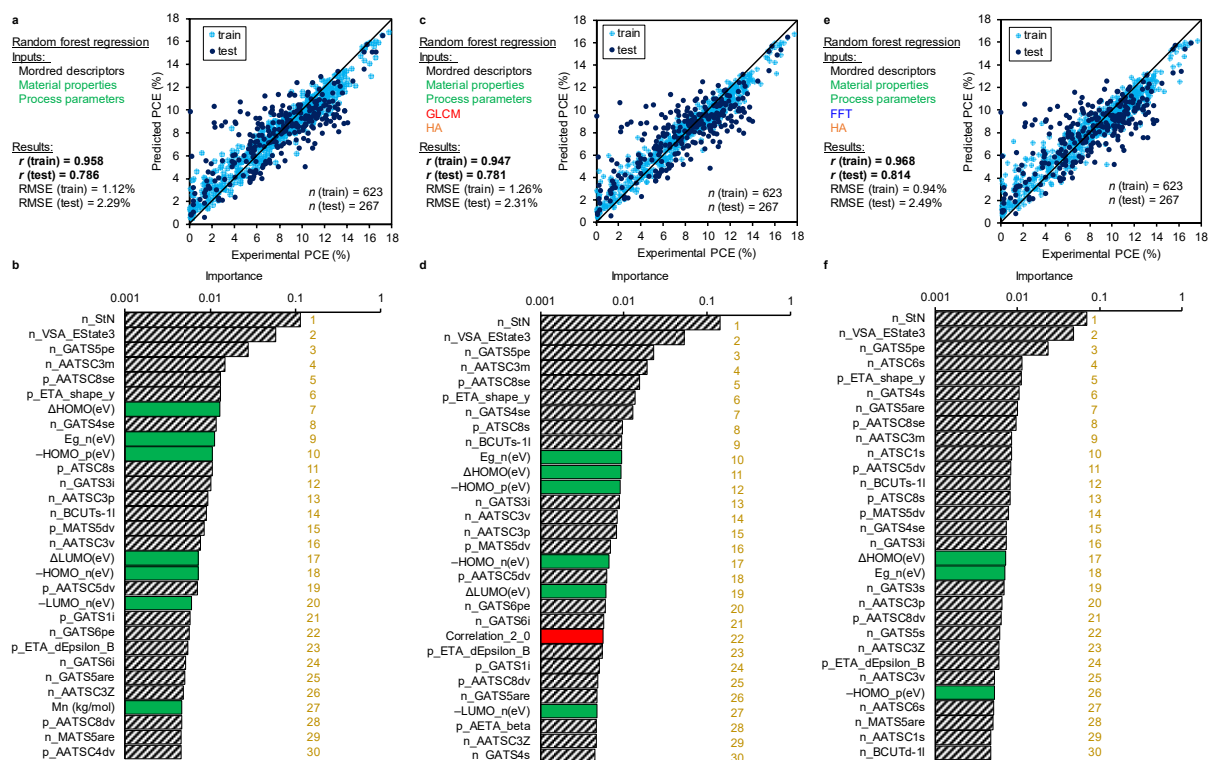

**Figure S3.** Results of RF regression. (a)(b) The explanatory variables are chemical structures (Mordred descriptors), material properties (bandgap, etc), and process parameters (solvent, etc). (c)(d) The aforementioned parameters plus GLCM and HA data. (e)(f) The aforementioned parameters plus FFT and HA data. The upper panels (a, c, e) are the regression plots of experimental (horizontal) and predicted (vertical) PCE. The white blue ( $n = 623$ ) and dark ( $n = 267$ ) circles are train and test data, respectively. The correlation coefficient ( $r$ ) values of the train and test data are appended. The lower panels (b, d, f) are the feature importance in decent order. The green, red, orange, and blue bars correspond to the material properties and process parameters, GLCM parameters, HA parameters, and FFT parameters, respectively. A complete list of ranking is provided in **Tables S9–S11**.

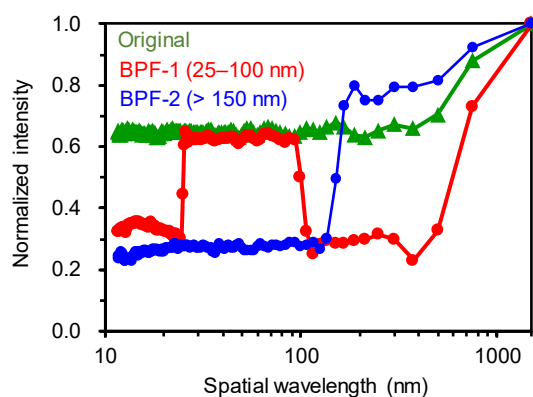

**Figure S4.** IFPS of gray-scale images generated by applying noise (green), that processed with BPF-1 (25–100 nm, red), and that processed with BPF-2 (> 150 nm, blue).

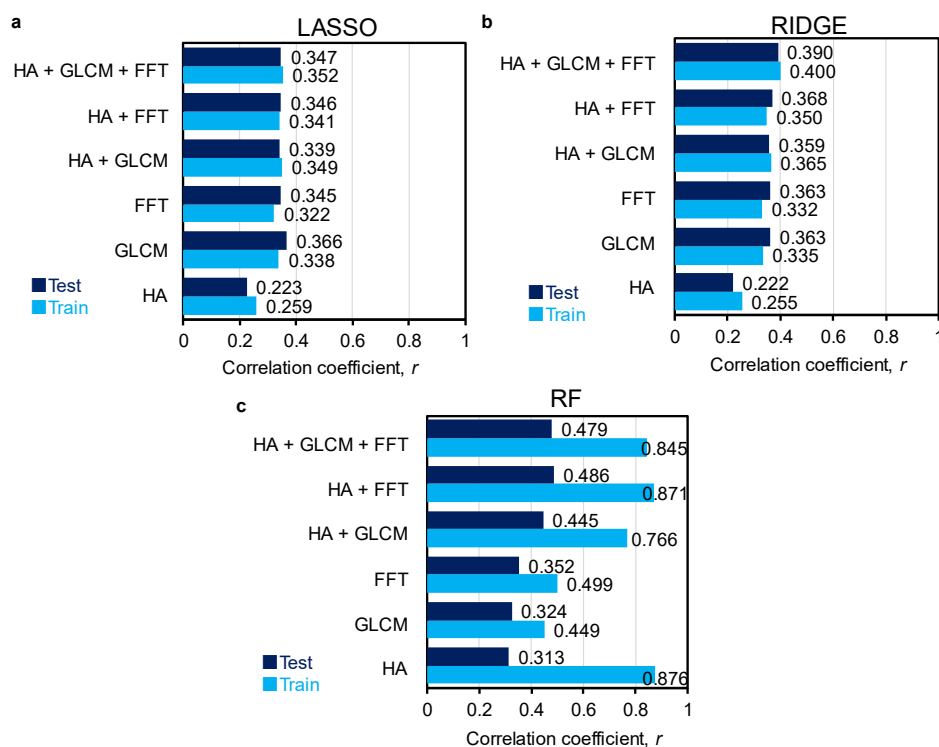

**Figure S5.** Correlation coefficients of (a) LASSO, (b) Ridge, and (c) RF model constructed solely using AFM data (HA, GLCM, FFT, and their combination) as the explanatory variables. Chemical structures (Mordred descriptors), material properties, and process parameters were not used. The objective variable is PCE. The dark and white blue bars are test and train data, respectively.
